# Supplementary material
Source: Springer Nature journal article supplement (https://www.springermedizin.de/resource/supplementary/13054_2011_9855_MOESM1_ESM.pdf/9707112)

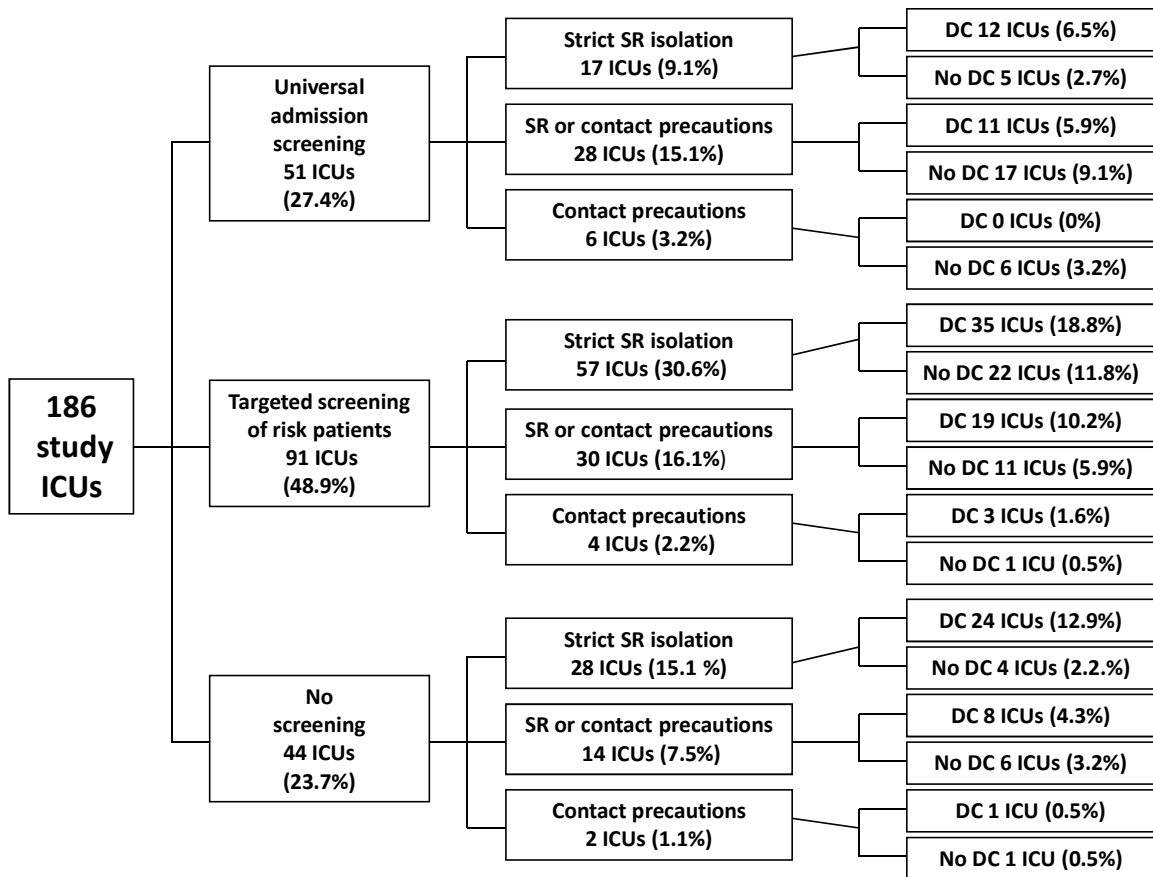

Supplement: MOESM1 [file 9707112]
